# Supplementary material
Source: ML conference proceedings conference paper supplement (https://proceedings.neurips.cc/paper_files/paper/2019/hash/8c66bb19847dd8c21413c5c8c9d68306-Abstract.html)
Supplement: Supplementary file [file 8c66bb19847dd8c21413c5c8c9d68306-Supplemental.zip]

---

# Supplemental Material of "Triad Constraints for Learning Causal Structure of Latent Variables"

---

## A Proof of the Theorems and Propositions

We begin with the Darmois-Skitovitch Theorem [Kagan *et al.*, 1973].

**Darmois-Skitovitch Theorem (D-S Theorem):** Define two random variables  $X_1$  and  $X_2$  as linear combinations of independent random variables  $n_i (i = 1, \dots, q)$ :

$$X_1 = \sum_{i=1}^q \alpha_i n_i, X_2 = \sum_{i=1}^q \beta_i n_i.$$

Then, if  $X_1$  and  $X_2$  are independent, all variables  $n_j$  for which  $\alpha_j \beta_j \neq 0$  are Gaussian. In other words, if there exists a non-Gaussian  $n_j$  for which  $\alpha_j \beta_j \neq 0$ ,  $X_1$  and  $X_2$  are dependent.

### A.1 Proof of the Theorem 1

**Theorem 1.** Let  $L_a$  and  $L_b$  be two directed connected latent variables without confounders and let  $\{X_i\}$  and  $\{X_j, X_k\}$  be their children, respectively. Then if  $\{X_i, X_j\}$  and  $X_k$  violate the Triad constraint,  $L_a \rightarrow L_b$  holds. In other words, if the Triad condition is violated and the latent variables have no confounders, then the latent variable of the reference variable is a child of the other latent variable.

*Proof.* For  $L_a$  and  $L_b$ , there are two possible causal relations,  $L_a \rightarrow L_b$  and  $L_b \rightarrow L_a$ , corresponding to the causal structure (a) and (b) in Figure 1.

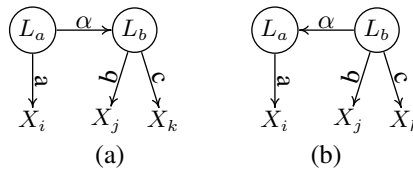

Figure 1: Identification of causal direction between two latent variables based on Triad constraints

In the non-trivial case, the causal strengths  $\alpha, a, b$  and  $c$  are not equal to 0.

As the variables strictly follow linear assumption, for the structure (a), we obtain

$$\begin{aligned} L_a &= \varepsilon_{L_a}, \\ L_b &= \alpha L_a + \varepsilon_{L_b} = \alpha \varepsilon_{L_a} + \varepsilon_{L_b}, \end{aligned} \tag{1}$$

$$\begin{aligned} X_i &= a L_a + \varepsilon_{X_i} = a \varepsilon_{L_a} + \varepsilon_{X_i}, \\ X_j &= b L_b + \varepsilon_{X_j} = b \alpha \varepsilon_{L_a} + b \varepsilon_{L_b} + \varepsilon_{X_j}, \\ X_k &= c L_b + \varepsilon_{X_k} = c \alpha \varepsilon_{L_a} + c \varepsilon_{L_b} + \varepsilon_{X_k}. \end{aligned} \tag{2}$$

Then  $E_{(i,j|k)}$  is as follows:

$$\begin{aligned}
E_{(i,j|k)} &= X_i - \frac{\text{Cov}(X_i, X_k)}{\text{Cov}(X_j, X_k)} \cdot X_j \\
&= a\varepsilon_{L_a} + \varepsilon_{X_i} - t \cdot (b\alpha\varepsilon_{L_a} + b\varepsilon_{L_b} + \varepsilon_{X_j}), \\
&= (a - \alpha tb)\varepsilon_{L_a} + \varepsilon_{X_i} - tb\varepsilon_{L_b} - t\varepsilon_{X_j},
\end{aligned} \tag{3}$$

where  $t = \frac{\alpha ac \text{Var}(\varepsilon_{L_a})}{(\alpha)^2 bc \text{Var}(\varepsilon_{L_a}) + bc \text{Var}(\varepsilon_{L_b})} \neq 0$ .

For  $\{X_i, X_j\}$  and  $X_k$ , based on Equation (3) and Equation (2), we can find that they have one common non-Gaussian noise  $\varepsilon_{L_b}$  and  $tb \neq 0, c \neq 0$ . Hence, by D-S theorem, we have  $E_{(i,j|k)} \not\perp\!\!\!\perp X_k$ , i.e.,  $\{X_i, X_j\}$  and  $\{X_k\}$  violate the Triad constraint.

Similarly for the structure (b), we have

$$\begin{aligned}
L_b &= \varepsilon_{L_b}, \\
L_a &= \alpha L_b + \varepsilon_{L_a} = \alpha\varepsilon_{L_b} + \varepsilon_{L_a},
\end{aligned} \tag{4}$$

$$\begin{aligned}
X_i &= aL_a + \varepsilon_{X_i} = a\alpha\varepsilon_{L_b} + a\varepsilon_{L_a} + \varepsilon_{X_i}, \\
X_j &= bL_b + \varepsilon_{X_j} = b\varepsilon_{L_b} + \varepsilon_{X_j}, \\
X_k &= cL_b + \varepsilon_{X_k} = c\varepsilon_{L_b} + \varepsilon_{X_k}.
\end{aligned} \tag{5}$$

Then the pseudo residual  $E_{(i,j|k)}$  is as below.

$$\begin{aligned}
E_{(i,j|k)} &= X_i - \frac{\text{Cov}(X_i, X_k)}{\text{Cov}(X_j, X_k)} \cdot X_j \\
&= a\alpha\varepsilon_{L_b} + a\varepsilon_{L_a} + \varepsilon_{X_i} - \frac{a\alpha}{b} \cdot (b\varepsilon_{L_b} + \varepsilon_{X_j}) \\
&= a\varepsilon_{L_a} + \varepsilon_{X_i} - \frac{a\alpha}{b} \varepsilon_{X_j}.
\end{aligned} \tag{6}$$

For  $\{X_i, X_j\}$  and  $X_k$ , based on Equation (6) and Equation (5), we find that there is no common non-Gaussian, independent component shared by  $E_{(i,j|k)}$  and  $X_k$ . According to D-S Theorem, we reach the result that  $E_{(i,j|k)} \perp\!\!\!\perp X_k$ , i.e.,  $\{X_i, X_j\}$  and  $\{X_k\}$  satisfy the Triad constraint. This finishes the proof.  $\square$

## A.2 Proof of the Theorem 2

**Theorem 2.** Let  $S$  be a set of correlated variables. If  $\forall X_i, X_j \in S$  and  $\forall X_k \in \mathbf{X} \setminus S$ ,  $\{X_i, X_j\}$  and  $X_k$  satisfy the Triad constraints, then  $S$  is a cluster.

*Proof.* The proof is done by contradiction. Assume  $S$  is not a cluster, the elements in  $S$  must have at least two different parental latent variables. Without loss of generality, let  $L_a$  and  $L_b$  be the two latent variables, and let their children be  $\{X_i, X_j\}$  and  $\{X_k, X_l\}$ , respectively. There are two cases to consider.

Case 1). When there is a causal relationship between  $L_a$  and  $L_b$ , e.g.,  $L_a$  is the ancestor of  $L_b$ . We know that  $X_k$  contains the noise  $\varepsilon_{L_b}$  while  $X_i$  and  $X_j$  do not. Since  $S$  is a correlated variable set, then  $X_i, X_j$ , and  $X_k$  are related, i.e.,  $\text{Cov}(X_i, X_j) \neq 0$  and  $\text{Cov}(X_k, X_j) \neq 0$ . By  $E_{(i,k|j)} = X_i - \frac{\text{Cov}(X_i, X_k)}{\text{Cov}(X_k, X_j)} \cdot X_k$ , we obtain that  $E_{(i,k|j)}$  must contain  $\varepsilon_{L_b}$ . According to D-S Theorem,  $E_{(i,k|j)} \not\perp\!\!\!\perp X_j$ , i.e.,  $\{X_i, X_k\}$  and  $X_j$  violate Triad constraint, which contradicts the original assumption.

Case 2). When there is no causal relationship between  $L_a$  and  $L_b$ . Since  $S$  is a correlated variable set, we know  $L_a \not\perp\!\!\!\perp L_b$ . Therefore,  $L_a$  and  $L_b$  have at least one common ancestor. This structure shows that  $\{X_i, X_j\}$  and  $\{X_k, X_l\}$  contain respective latent variable noises, i.e.,  $\varepsilon_{L_a}$  and  $\varepsilon_{L_b}$ . Therefore,  $E_{(i,k|j)}$  and  $E_{(i,k|l)}$  both contain  $\varepsilon_{L_a}$  and  $\varepsilon_{L_b}$ . Based on the D-S Theorem,  $E_{(i,k|j)} \not\perp\!\!\!\perp X_j$  and  $E_{(i,k|l)} \not\perp\!\!\!\perp X_l$ , i.e.,  $\{X_i, X_k\}$  and  $X_j$  violate Triad constraint, and so do  $\{X_i, X_k\}$  and  $X_l$ . This contradicts the original assumption.

Based on the above analysis, Theorem 2 holds.  $\square$

### A.3 Proof of the Proposition 1

**Proposition 1.** Let  $C_1$  and  $C_2$  be two clusters. If  $C_1$  and  $C_2$  are overlapping,  $C_1$  and  $C_2$  share a same latent parent.

*Proof.* Since  $C_1$  and  $C_2$  are two clusters, then the elements in  $C_1$  have only one common latent variable. Without loss of generality, we let  $L_1$  denote the parental latent variable of  $C_1$ . Similarly,  $L_2$  denotes the parental latent variable of  $C_2$ . Since  $C_1$  and  $C_2$  are overlapping, then they have at least one shared element. Let  $X_i$  denote the shared element of  $C_1$ . then  $X_i$  has two latent parents  $L_1$  and  $L_2$ , which contradicts with Theorem 1. This finishes the proof.  $\square$

### A.4 Proof of the Proposition 2

**Proposition 2.** Given a latent variable  $L_r$  and its two children  $\{V_i, V_j\}$ ,  $L_r$  is a root latent variable if and only if  $E_{(i,j|k)} \perp\!\!\!\perp V_k$  holds for all the  $V_k$ , where  $V_k$  is a child of any other latent variables.

*Proof.* (i) " $\Rightarrow$ " Since  $L_r$  is a root latent variable, there is no confounder between  $L_r$  and another latent variables. Based on Theorem 1, we reach the conclusion that  $E_{(i,j|k)} \perp\!\!\!\perp V_k$  holds for all  $V_k$ .

(ii) " $\Leftarrow$ " This part of proof is proved by contradiction. Assume  $L_r$  is not a root variable,  $L_r$  has at least one parent. Considering the following two cases. Case 1:  $L_r$  has only one parent. Let  $L_s$  denote the parent of  $L_r$  and  $\{V_k\}$  denote a child of  $L_s$ . Based on Theorem 1,  $E_{(i,k|j)}$  is not independent of  $V_j$ . Case 2:  $L_r$  has more than one parent, e.g.,  $L_s$  and  $L_t$ , where their children variables are  $\{V_k\}$  and  $\{V_l\}$  respectively. If  $L_s \perp\!\!\!\perp L_t$ , based on the Theorem 1, one can find that  $E_{(i,k|j)}$  is not independent of  $V_j$  and that  $E_{(i,l|j)}$  is not independent of  $V_j$ . If  $L_s \not\perp\!\!\!\perp L_t$  and  $L_s \rightarrow L_t$ , due to linear assumption,  $E_{(i,p|j)}$  always contains noise  $\varepsilon_{L_t}$  and  $V_p$  also contains this noise variable. According to D-S theorem,  $E_{(i,p|j)}$  is not independent of  $V_p$ ; Similarly, when  $L_s \not\perp\!\!\!\perp L_t$  and  $L_s \leftarrow L_t$ ,  $E_{(i,k|j)}$  is not independent of  $V_k$ . The results of Case 1 and Case 2 show that the assumption does not hold, and  $L_r$  is a root variable. This finishes the proof.  $\square$

## B The correctness of Phase 2

We illustrate the correctness of Phase 2, especially the procedure of learning causal order of latent variables recursively, with the example in our paper.

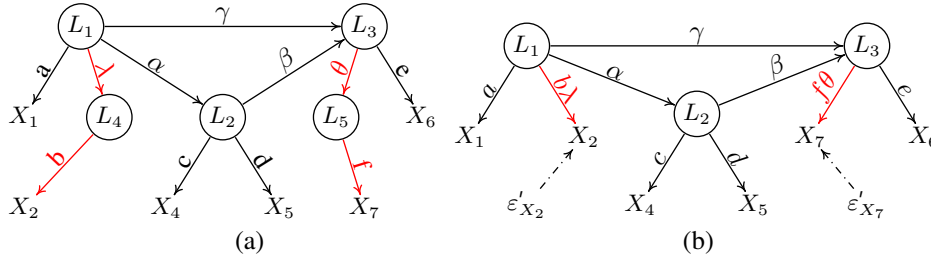

Figure 2: The considered structure in our paper, where (a) is the ground truth graph, (b) is the equivalent graph of (a)

In phase 1, we have get three clusters  $\{\{X_1, L_4\}, \{X_4, X_5\}, \{X_6, L_5\}\}$  and their latent variables are  $L_1, L_2$  and  $L_3$ , respectively. Next, we will show the process of Phase 2 step by step.

Note that, although we can not get the observed values of latent variables  $L_4$  and  $L_5$ , we can use the values of their pure child as surrogates (This is because linear causal models are transitive). Here, we use  $X_2$  and  $X_7$  to replace  $L_4$  and  $L_5$ , respectively, where  $\varepsilon'_{X_2} = b\lambda\varepsilon_{L_4} + \varepsilon_{X_2}$  and  $\varepsilon'_{X_7} = f\varepsilon_{L_5} + \varepsilon_{X_7}$  (See Figure 3).

We obtain,

$$\begin{aligned}
X_1 &= aL_1 + \varepsilon_{X_1}, \\
X_2 &= b\lambda L_1 + \varepsilon'_{X_2}, \\
X_4 &= cL_2 + \varepsilon_{X_4} = c(\alpha L_1 + \varepsilon_{L_2}) + \varepsilon_{X_4} = cL'_2 + c\alpha L_1 + \varepsilon_{X_4}, \\
X_5 &= dL_2 + \varepsilon_{X_5} = d(\alpha L_1 + \varepsilon_{L_2}) + \varepsilon_{X_5} = dL'_2 + d\alpha L_1 + \varepsilon_{X_5},
\end{aligned} \tag{7}$$

$$\begin{aligned}
X_6 &= eL_3 + \varepsilon_{X_6} = e((\gamma + \alpha\beta)L_1 + \beta\varepsilon_{L_2} + \varepsilon_{L_3}) + \varepsilon_{X_6} \\
&= eL'_3 + e(\gamma + \alpha\beta)L_1 + \varepsilon_{X_6}, \\
X_7 &= f\theta L_3 + \varepsilon'_{X_7} = f\theta((\gamma + \alpha\beta)L_1 + \beta\varepsilon_{L_2} + \varepsilon_{L_3}) + \varepsilon'_{X_7} \\
&= f\theta L'_3 + f\theta(\gamma + \alpha\beta)L_1 + \varepsilon'_{X_7},
\end{aligned} \tag{8}$$

We can then learn the causal structure of latent variable step by step in the following way.

- First, according to the Proposition 2, we know that  $\{X_1, X_2\}$  correspond to the root latent cause.
- Next, we are ready to find the causal direction between the latent variables  $L_2$  and  $L_3$ . Let us consider the pseudo residual variables  $E_{(i,k|l)}$  instead of  $X_i$ , where  $i \in \{4, 5, 6, 7\}$ ,  $k \in \{1, 2\}$ ,  $l \in \{1, 2\}$  and  $k \neq l$ . For convenience, we let  $L'_2 := \varepsilon_{L_2}$  and  $L'_3 := \beta\varepsilon_{L_2} + \varepsilon_{L_3}$ . Then, we update the rest of variables by  $\{X_1, X_2\}$ ,

$$E_{(4,1|2)} = X_4 - \frac{\text{Cov}(X_4, X_2)}{\text{Cov}(X_1, X_2)} \cdot X_1 = cL'_2 + \varepsilon_{X_4} - \frac{c\alpha}{a} \cdot \varepsilon_{X_1} \tag{9}$$

$$\begin{aligned}
E_{(6,1|2)} &= e((\gamma + \alpha\beta)L_1 + \beta\varepsilon_{L_2} + \varepsilon_{L_3}) + \varepsilon_{X_6} - \frac{e((\gamma + \alpha\beta))}{a}(aL_1 + \varepsilon_{X_1}) \\
&= eL'_3 + \varepsilon_{X_6} - \frac{e((\gamma + \alpha\beta))}{a}\varepsilon_{X_1}.
\end{aligned} \tag{10}$$

- Finally, combining equations (7-10) and Theorem 1, one can see that  $\{E_{(4,1|2)}, E_{(6,1|2)}\}$  and  $X_5$  satisfy the Triad constraint and that  $\{E_{(4,1|2)}, E_{(6,1|2)}\}$  and  $X_7$  violate it. Figure 4 gives the graphical representations of the relationships among those variables, from which the above conclusion can be immediately seen. Thanks to this asymmetry, we know that the latent variable  $L_2$ , which generated  $\{X_4, X_5\}$ , is a cause of  $L_3$ , which generated  $\{X_6, X_7\}$ .

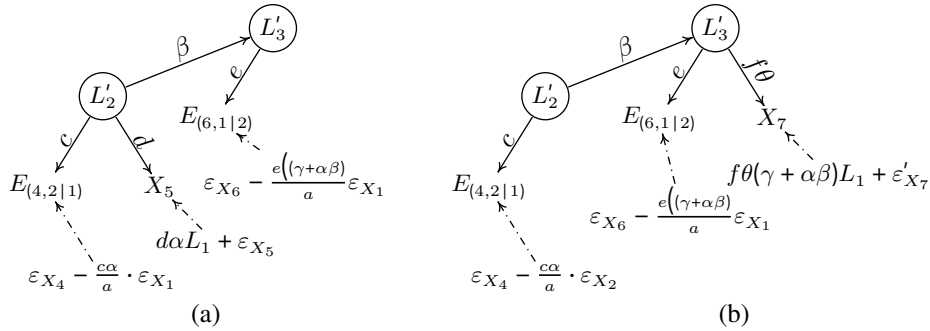

Figure 3: Using the Triad constraint to determine the direction between  $L_2$  and  $L_3$ . (a)  $\{E_{(4,1|2)}, E_{(6,1|2)}\}$  and  $X_5$  satisfy the Triad constraint. (b)  $\{E_{(4,1|2)}, E_{(6,1|2)}\}$  and  $X_7$  violate the Triad constraint. The influences of noise terms are shown by dashed lines; note that the noise terms are mutually independent in each case.

## References

Abram M Kagan, Calyampudi Radhakrishna Rao, and Yuriy Vladimirovich Linnik. Characterization problems in mathematical statistics. 1973.
